# Supplementary material for: Clinical implications of the log linear association between LDL-C lowering and cardiovascular risk reduction: Greatest benefits when LDL-C >100 mg/dl
Source: PubMed Central journal article supplement (PMC7595281; doi:10.1371/journal.pone.0240166), 2020-10-29
Supplement: pone.0240166.s007.pdf [file pone.0240166.s007.pdf]

## SYSTEMATIC REVIEW RESULTS

### Moderate versus high intensity statin trial subgroups

No new publications were identified that reported subgroup analyses with ASCVD outcomes for the moderate versus high intensity statin trials. The data included below are from Robinson, J.G., et al., *Determining When to Add Nonstatin Therapy: A Quantitative Approach*. Journal of the American College of Cardiology, 2016. **68**(22): 2412-2421 were used for the analyses of moderate versus high intensity statins in this paper.

### Data Table A - Moderate versus high intensity statin trial subgroups

All participants had coronary heart disease. Subjects were randomized to a high intensity statin (atorvastatin 80 mg) or moderate intensity statin (atorvastatin 10 mg or simvastatin 20-40 mg).

| Trial                                 | Statin intensity | On-treatment LDL-C | Median trial duration | Observed rate for trial | Annualized rate |
|---------------------------------------|------------------|--------------------|-----------------------|-------------------------|-----------------|
| <b>≥4.0% annualized ASCVD risk</b>    |                  |                    |                       |                         |                 |
| IDEAL Simv PVD                        | Moderate         | 104                | 4.8                   | 26.3                    | 5.5             |
| IDEAL Ato PVD                         | High             | 86                 | 4.8                   | 13.1                    | 4.3             |
| TNT 10 DM CKD                         | Moderate         | 99                 | 4.9                   | 20.9                    | 4.3             |
| TNT 80 DM CKD                         | High             | 75                 | 4.9                   | 13.9                    | 2.8             |
| TNT 10 resistant HTN                  | Moderate         | 99                 | 4.9                   | 19.9                    | 4.1             |
| TNT 80 resistant HTN                  | High             | 77                 | 4.9                   | 14.5                    | 3.0             |
| <b>3.0-4% annualized ASCVD risk</b>   |                  |                    |                       |                         |                 |
| TNT/IDEAL 10 smoker                   | Moderate         | 99                 | 4.9                   | 15.2                    | 3.6             |
| TNT/IDEAL 80 smoker                   | High             | 77                 | 4.9                   | 13.6                    | 2.8             |
| IDEAL CKD simv                        | Moderate         | 100                | 4.8                   | 16.9                    | 3.5             |
| IDEAL CKD ato                         | High             | 80                 | 4.8                   | 16.1                    | 3.4             |
| TNT 10 DM                             | Moderate         | 99                 | 4.9                   | 17.9                    | 3.7             |
| TNT 80 DM                             | High             | 77                 | 4.9                   | 13.8                    | 2.8             |
| IDEAL_65-80 Simv                      | Mod              | 99                 | 4.8                   | 17.4                    | 3.6             |
| IDEAL 65-80 Ato                       | High             | 83                 | 4.8                   | 16.2                    | 3.4             |
| <b>&lt;3.0% annualized ASCVD risk</b> |                  |                    |                       |                         |                 |
| TNT + MS 10                           | Moderate         | 99                 | 4.9                   | 11.6                    | 2.4             |
| TNT + MS 80                           | High             | 73                 | 4.9                   | 8.2                     | 1.7             |
| TNT-No MS 10                          | Moderate         | 99                 | 4.9                   | 9.1                     | 2.0             |
| TNT-No MS 80                          | High             | 73                 | 4.9                   | 8.1                     | 1.6             |
| TNT 10-No DM                          | Moderate         | 99                 | 4.9                   | 9.7                     | 2.0             |
| TNT 80-No DM                          | High             | 77                 | 4.9                   | 7.8                     | 1.6             |
| TNT-No res HTN 10                     | Moderate         | 99                 | 4.9                   | 9.8                     | 2.0             |
| TNT-No res HTN 80                     | High             | 79                 | 4.9                   | 8.0                     | 1.6             |
| IDEAL no CKD sim                      | Moderate         | 100                | 4.8                   | 12.5                    | 2.6             |
| IDEAL no CKD ato                      | High             | 80                 | 4.8                   | 10.5                    | 2.2             |

|                         |          |      |     |      |       |
|-------------------------|----------|------|-----|------|-------|
| TNT CHD + CABG 10       | Moderate | 101  | 4.9 | 13.0 | 2.7   |
| TNT CHD + CABG 80       | High     | 79   | 4.9 | 97.0 | 2.0   |
| IDEAL -Ato<65 years     | High     | 83   | 4.8 | 8.9  | 1.9   |
| IDEAL -Sim<65 years     | Moderate | 104  | 4.8 | 11.0 | 2.3   |
| IDEAL-Ato-no PVD        | High     | 82   | 4.8 | 11.6 | 2.4   |
| IDEAL-Simv-no PVD       | Moderate | 101  | 4.8 | 13.1 | 2.7   |
| IDEAI/TNT fm smk Sim    | Moderate | 100  | 4.9 | 12.9 | 2.6   |
| IDEAL/TNT Nv Smk sim    | Moderate | 100  | 4.9 | 11.8 | 2.4   |
| IDEAI/TNT fm smk Ato 10 | Moderate | 99   | 4.9 | 10.7 | 2.2   |
| IDEAI/TNT Nv smk Ato 10 | Moderate | 99   | 4.9 | 9.3  | 1.9   |
| IDEAI/TNT fm smk Ato 80 | High     | 77   | 4.9 | 9.6  | 2.0   |
| IDEAI/TNT Nv smk Ato 80 | High     | 77   | 4.9 | 9.7  | 2.0   |
| TNT 65-75 10            | Moderate | 97   | 4.9 | 12.6 | 2.57  |
| TNT 65-75               | High     | 72   | 4.9 | 10.3 | 2.10  |
| TNT<65 10               | Moderate | 97   | 4.9 | 10   | 2.041 |
| TNT<65 80               | High     | 72   | 4.9 | 7.7  | 1.571 |
| TNT DM no CKD 10        | Moderate | 98.6 | 4.9 | 14.1 | 2.877 |
| TNT DM no CKD 80        | High     | 74.9 | 4.9 | 12.8 | 2.612 |

### Abbreviations

|                |                                                          |
|----------------|----------------------------------------------------------|
| LDL            | Mean/Median on treatment LDL cholesterol in mg/dL        |
| AR             | Estimated 10-year Absolute Risk %                        |
| n              | Sample size in each sub group                            |
| LogRisk        | Natural log of Extrapolated 10-year Absolute Risk %      |
| Predicted Risk | Predicted 10-year Absolute Risk by the Log Linear model. |

### Abbreviations

#### Statin trial subgroups

|         |                                                                                           |
|---------|-------------------------------------------------------------------------------------------|
| IDEAL   | Incremental Decrease in End Points Through Aggressive Lipid Lowering (IDEAL) Study Group. |
| TNT     | Treating to New Targets (TNT) trial                                                       |
| Ato     | Atorvastatin                                                                              |
| Simv    | Simvastatin                                                                               |
| DM      | Diabetes Mellitus                                                                         |
| MS      | Metabolic Syndrome                                                                        |
| CABG    | Coronary artery bypass graft                                                              |
| res HTN | Resistant Hypertension                                                                    |
| CKD     | Chronic kidney disease defined as eGFR <60 mL/min/1.73 m <sup>2</sup>                     |
| PVD     | Peripheral arterial disease                                                               |
| fm smk  | Former Smoker                                                                             |
| Nv smk  | Never Smoker                                                                              |
| CHD     | Coronary Heart Disease                                                                    |

|       |                            |
|-------|----------------------------|
| <65   | Age less than 65 years     |
| 65-80 | Age 65 years to 80 years   |
| 65-75 | Age 65 to 75 years         |
| 10    | Atorvastatin dose 10mg/day |
| 80    | Atorvastatin dose 80mg/day |

## Ezetimibe versus placebo with background statin therapy

An updated PubMed search was performed on 10/30/10 including the last name of the IMPROVE-IT principal investigator (Cannon) and limited to Jan 1, 2015 or later. The results of the search are provided in **Supplemental Figure A and Data Table B** below. One trial of ezetimibe was identified, IMPROVE-IT. This trial enrolled subjects with a recent acute coronary syndrome who had an LDL-C 50-100 mg/dl on simvastatin therapy, or 50-120 mg/dl if not on statin therapy.

Several subgroup analyses have been published, but only 3 analyses reported ASCVD event rates for the subgroups.

Subgroups identified:

- High risk ( $\geq 3$  risk enhancers)<sup>1</sup>
- Intermediate risk (2 risk enhancers)<sup>1</sup>
- Low risk (0-1 risk enhancer)<sup>1</sup>
  - Risk enhancers: Heart failure, hypertension, age  $\geq 75$  years, diabetes mellitus, prior stroke, prior coronary artery bypass grafting, peripheral arterial disease, estimated glomerular filtration rate  $< 60$  ml/min/1.73 m<sup>2</sup>, current smoking)
- Diabetes<sup>2</sup>
- No diabetes<sup>2</sup>
- Age  $\geq 75$  years<sup>3</sup>
- Age 65-74 years<sup>3</sup>
- Age  $< 65$  years<sup>3</sup>

### Supplemental Figure A

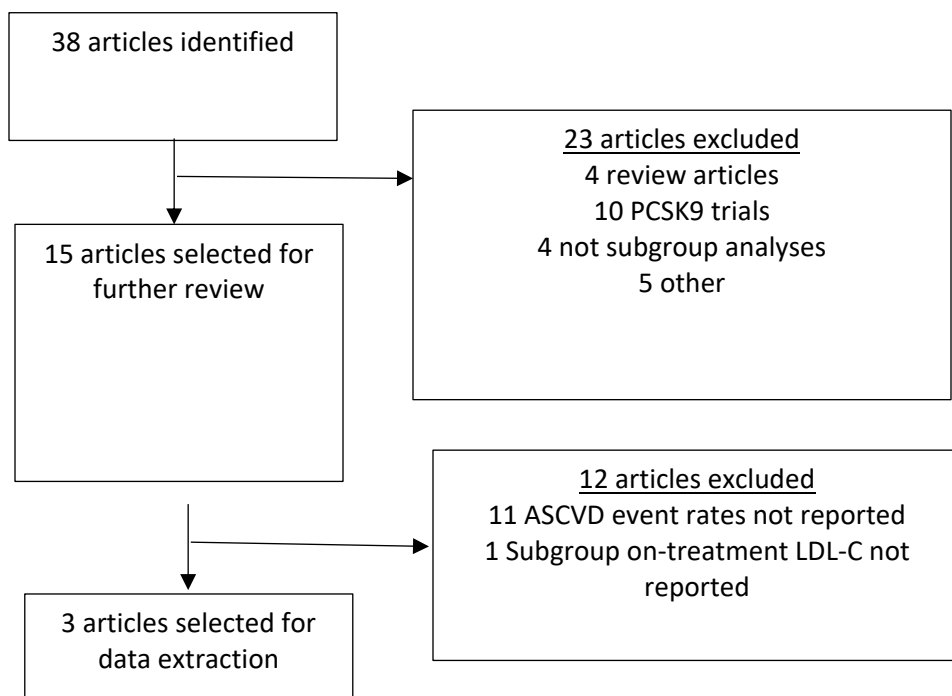

**Data Table B.** Ezetimibe cardiovascular outcomes trial

| Trial subgroup       | Randomized treatment | On-treatment LDL-C | KM trial duration | Observed rate for trial | Annualized rate |
|----------------------|----------------------|--------------------|-------------------|-------------------------|-----------------|
| <b>Risk &gt;=40%</b> |                      |                    |                   |                         |                 |
| IMPROVE-IT >3 HRI    | Ezetimibe            | 48                 | 7                 | 33.9                    | 4.8             |
| IMPROVE-IT >3 HRI    | Simvastatin          | 66                 | 7                 | 40.2                    | 5.7             |
| IMPROVE-IT 75        | Ezetimibe            | 46                 | 7                 | 31.3                    | 4.5             |
| IMPROVE-IT 75        | Simvastatin          | 64                 | 7                 | 38                      | 5.4             |
| IMPROVE-IT DM        | Simvastatin          | 65                 | 7                 | 29.9                    | 4.3             |
| IMPROVE-IT DM        | Ezetimibe            | 46                 | 7                 | 25.3                    | 3.6             |
| <b>Risk 30-39%</b>   |                      |                    |                   |                         |                 |
| IMPROV-IT 2 HRI      | Ezetimibe            | 49                 | 7                 | 19.3                    | 2.8             |
| IMPROVE-IT 2 HRI     | Simvastatin          | 67                 | 7                 | 21.5                    | 3.1             |
| IMPROVE-IT 65-74     | Ezetimibe            | 48                 | 7                 | 22.4                    | 3.2             |
| IMPROVE-IT 65-74     | Simvastatin          | 66                 | 7                 | 23                      | 3.3             |
| <b>Risk 20-29%</b>   |                      |                    |                   |                         |                 |
| IMPROVE-IT 0-1       |                      |                    |                   |                         | 0.0             |
| HRI                  | Ezetimibe            | 51                 | 7                 | 13.1                    | 2.0             |
| IMPROVE-IT 0-1       |                      |                    |                   |                         |                 |
| HRI                  | Simvastatin          | 68                 | 7                 | 14                      | 1.9             |

|                  |             |    |   |      |     |
|------------------|-------------|----|---|------|-----|
| IMPROVE-IT <65   | Ezetimibe   | 51 | 7 | 16.6 | 2.4 |
| IMPROVE-IT <65   | Simvastatin | 69 | 7 | 17.8 | 2.5 |
| IMPROVE-IT no DM | Ezetimibe   | 46 | 7 | 17.2 | 2.5 |
| IMPROVE-IT no DM | Simvastatin | 65 | 7 | 18   | 2.6 |

## References

1. Bohula EA, Morrow DA, Giugliano RP, et al. Atherothrombotic Risk Stratification and Ezetimibe for Secondary Prevention. *J Am Coll Cardiol.* 2017;69(8):911-921.
2. Giugliano RP, Cannon CP, Blazing MA, et al. Benefit of Adding Ezetimibe to Statin Therapy on Cardiovascular Outcomes and Safety in Patients With Versus Without Diabetes Mellitus. *Circulation* 2018;137(15):1571-1582.
3. Bach RG, Cannon CP, Giugliano RP, et al. Effect of Simvastatin-Ezetimibe Compared With Simvastatin Monotherapy After Acute Coronary Syndrome Among Patients 75 Years or Older: A Secondary Analysis of a Randomized Clinical Trial. *JAMA Cardiology.* 2019; 4: 846-854

## PCSK9 inhibitors versus placebo on background statin therapy

The results of the search are provided in **Supplemental Figure B & Data Table C** below. The evolocumab trial FOURIER enrolled subjects with chronic ASCVD and additional high risk characteristics. All were treated with moderate or high intensity statin therapy and had an LDL-C  $\geq 70$  mg/dl or non-HDL-C  $\geq 100$  mg/dl at baseline (1). ASCVD was a secondary outcome.

The alirocumab trial ODYSSEY OUTCOMES trial enrolled subjects with an acute coronary syndrome <1 year prior to screening. All were treated with moderate or high intensity statin therapy and had an LDL-C  $\geq 70$  mg/dl or non-HDL-C  $\geq 100$  mg/dl at baseline (2). No ASCVD outcome (defined as CVD death, myocardial infarction, or stroke) was reported for this trial.

Subgroups identified in FOURIER:

- ASCVD stratified by hsCRP levels <1mg/dL, 1 to 3 mg/DL, > 3mg/dL.<sup>1</sup>
- ASCVD with history of myocardial infarction, presence and absence of Peripheral Arterial disease.<sup>2</sup>
- ASCVD on background maximal statin therapy and submaximal therapy.<sup>3</sup>
- ASCVD with baseline LDL less than 70mg/dL and more than 70mg/dL.<sup>3</sup>
- ASCVD with more than 2 prior myocardial infarction episodes and less than 2 prior myocardial infarctions.<sup>4</sup>
- ASCVD with recent myocardial infarction (< 2 years) and with history of myocardial infarction more than 2 years ago. <sup>4</sup>
- ASCVD with multi-vessel coronary artery disease and without multi-vessel coronary artery disease.<sup>4</sup>
- ASCVD with diabetes mellitus and without diabetes mellitus.<sup>5</sup>
- ASCVD stratified by Lp(a) <37 nM or  $\geq 37$  nM<sup>8</sup>

## Supplemental Figure B

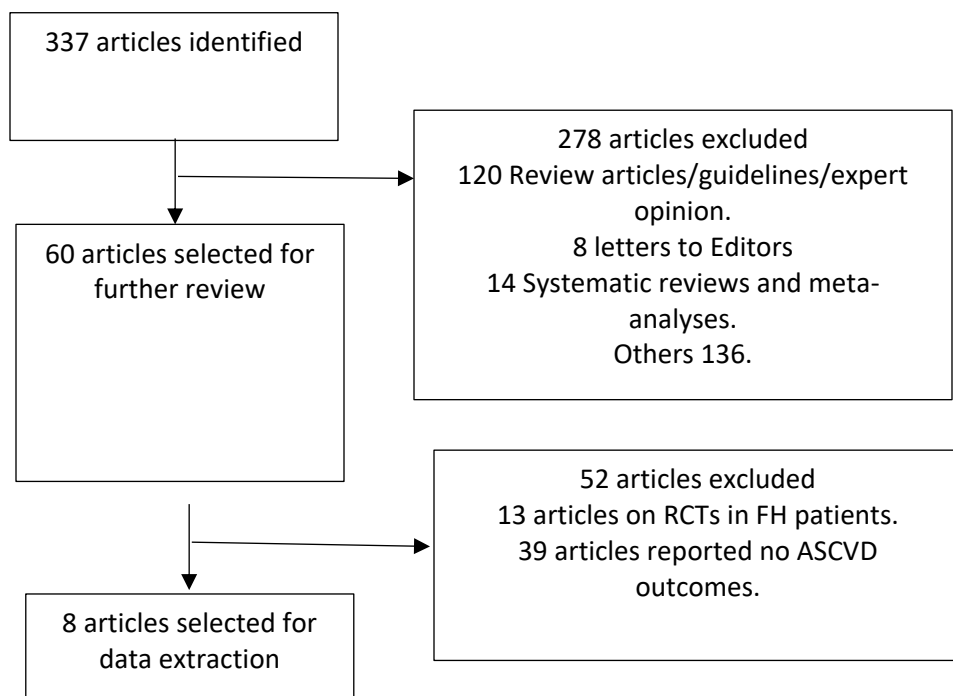

## Data Table C. PCSK9 inhibitor trial subgroups

All participants have cardiovascular disease and were receiving background statin therapy

| Trial subgroup                     | Randomized treatment | On-treatment LDL-C | Median or KM Trial Duration | Observed Rate for trial | Annualized rate |
|------------------------------------|----------------------|--------------------|-----------------------------|-------------------------|-----------------|
| <b>≥4.0% annualized ASCVD risk</b> |                      |                    |                             |                         |                 |
| Fourier PVD MI CVA Placebo         | Placebo              | 94                 | 2.5                         | 14.9                    | 5.2             |
| Fourier PVD MI CVA PCSK9           | PCSK9                | 31                 | 2.5                         | 9.5                     | 3.8             |
| Fourier 2PRIORMI Placebo           | Placebo              | 92                 | 3                           | 15                      | 5.0             |
| Fourier 2PRIORMI PCSK9             | PCSK9                | 30                 | 3                           | 12.4                    | 4.1             |
| Fourier MVD Placebo                | Placebo              | 93                 | 3                           | 12.6                    | 4.2             |
| Fourier MVD PCSK9                  | PCSK9                | 30                 | 3                           | 9.2                     | 3.1             |
| Fourier No max Statin placebo      | Placebo              | 91                 | 2.2                         | 9.7                     | 4.4             |
| Fourier No max Statin pcsk9        | PCSK9                | 32                 | 2.2                         | 7.9                     | 3.6             |
| ODYSSEY Placebo                    | Placebo              | 101.4              | 2.8                         | 11.9                    | 4.3             |
| ODYSSEY PCSK9                      | PCSK9                | 53.3               | 2.8                         | 10.3                    | 3.7             |
| Fourier hsCRP>3 Placebo            | Placebo              | 94                 | 3                           | 13.2                    | 4.4             |
| Fourier hsCRP>3 PCSK9              | PCSK9                | 30                 | 3                           | 10.2                    | 3.4             |
| Fourier DM Placebo                 | Placebo              | 89                 | 3                           | 12.2                    | 4.1             |
| Fourier DM PCSK9                   | PCSK9                | 31                 | 3                           | 10.2                    | 3.4             |



**3.0-3.9% annualized ASCVD risk**

|                               |         |      |     |      |     |
|-------------------------------|---------|------|-----|------|-----|
| Fourier Recent MI Placebo     | Placebo | 90   | 3   | 10.8 | 3.6 |
| Fourier Recent MI PCSK9       | PCSK9   | 29   | 3   | 7.9  | 2.6 |
| Fourier no Recent MI Placebo  | Placebo | 93   | 3   | 9.3  | 3.1 |
| Fourier no Recent MI PCSK9    | PCSK9   | 30   | 3   | 8.3  | 2.8 |
| Fourier MI CVA no PVD Placebo | Placebo | 91   | 2.5 | 7.6  | 3.0 |
| Fourier MI CVA no PVD         | PCSK9   | 31   | 2.5 | 6.2  | 2.5 |
| Fourier Max Statin placebo    | Placebo | 93   | 2.2 | 8.3  | 3.8 |
| Fourier Max Statin pcsk9      | PCSK9   | 32   | 2.2 | 6.5  | 3.0 |
| Fourier <70 placebo           | Placebo | 65.5 | 2.2 | 6.8  | 3.1 |
| Fourier <70 pcsk9             | PCSK9   | 21   | 2.2 | 4.7  | 2.1 |
| Fourier>70 placebo            | Placebo | 93.5 | 2.2 | 7.4  | 3.4 |
| Fourier>70 pcsk9              | PCSK9   | 32   | 2.2 | 6    | 2.7 |
| Fourier hsCRP 1 to 3 Placebo  | Placebo | 92   | 3   | 9.1  | 3.0 |
| Fourier hsCRP 1 to 3 PCSK9    | PCSK9   | 30   | 3   | 7.1  | 2.4 |
| Fourier Lp(a) >=37 nM         | Placebo | 98   | 3   | 11   | 3.7 |
| Fourier Lp(a) >=37 nM         | PCSK9   | 30   | 3   | 8.2  | 2.8 |

**<30% 10-year ASCVD risk**

|                           |         |    |   |     |     |
|---------------------------|---------|----|---|-----|-----|
| Fourier No DM Placebo     | Placebo | 93 | 3 | 8.4 | 2.8 |
| Fourier No DM PCSK9       | PCSK9   | 31 | 3 | 6.4 | 2.1 |
| Fourier no MVD Placebo    | Placebo | 92 | 3 | 8.9 | 3.0 |
| Fourier no MVD PCSK9      | PCSK9   | 29 | 3 | 7.6 | 2.5 |
| Fourier <2PRIORMI Placebo | Placebo | 92 | 3 | 8.2 | 2.7 |
| Fourier <2PRIORMI PCSK9   | PCSK9   | 29 | 3 | 6.6 | 2.2 |
| Fourier hsCRP<1 Placebo   | Placebo | 90 | 3 | 7.4 | 2.5 |
| Fourier hsCRP<1 PCSK9     | PCSK9   | 30 | 3 | 6.6 | 2.2 |
| Fourier Lp(a) <37 nM      | Placebo | 95 | 3 | 8.7 | 2.9 |
| Fourier Lp(a) <37 nM      | PCSK9   | 25 | 3 | 7.5 | 2.5 |

**Abbreviations PCSK9 trials**

|                        |                                                                                                                                                                                       |
|------------------------|---------------------------------------------------------------------------------------------------------------------------------------------------------------------------------------|
| <b>FOURIER</b>         | Further Cardiovascular Outcomes Research with PCSK9 Inhibition in Subjects with Elevated Risk Evaluation of Cardiovascular Outcomes After an Acute Coronary Syndrome During Treatment |
| <b>ODYSSEY</b>         | With Alirocumab                                                                                                                                                                       |
| <b>PVD</b>             | Peripheral vascular disease                                                                                                                                                           |
| <b>CVA</b>             | Cerebrovascular accident                                                                                                                                                              |
| <b>MI</b>              | Myocardial Infarction                                                                                                                                                                 |
| <b>&lt;2PRIORMI</b>    | One prior myocardial infarction episode                                                                                                                                               |
| <b>2PRIORMI</b>        | 2 or more prior myocardial infarction events                                                                                                                                          |
| <b>MVD</b>             | Presence of residual Multivessel Coronary artery disease ( $\geq 40\%$ stenosis in $\geq 2$ major vessels)                                                                            |
| <b>No MVD</b>          | Absence of residual Multivessel Coronary artery disease ( $\geq 40\%$ stenosis in $\geq 2$ major vessels)                                                                             |
| <b>No DM</b>           | No known history of Diabetes Mellitus                                                                                                                                                 |
| <b>DM</b>              | Diabetes Mellitus                                                                                                                                                                     |
| <b>hsCRP&lt;1</b>      | Baseline high-sensitivity C-reactive protein < 1mg/dL                                                                                                                                 |
| <b>hsCRP&lt;1 to 3</b> | Baseline high-sensitivity C-reactive protein 1-3 mg/dL                                                                                                                                |

|                      |                                                                                                    |
|----------------------|----------------------------------------------------------------------------------------------------|
| <b>hsCRP&gt;3</b>    | Baseline high-sensitivity C-reactive protein >3 mg/dL                                              |
| <b>Recent MI</b>     | Qualifying myocardial infarction equal to or more than 2 years ago                                 |
| <b>no Recent MI</b>  | Qualifying myocardial infarction less than 2 years ago                                             |
| <b>&lt;70</b>        | Baseline LDL-C <70 mg/dL                                                                           |
| <b>&gt;70</b>        | Baseline LDL-C >70 mg/dL                                                                           |
| <b>Max Statin</b>    | Maximal Potency Background Statin                                                                  |
| <b>No max Statin</b> | Submaximal Potency Background Statin                                                               |
| <b>MI CVA no PVD</b> | History of prior Myocardial infarction or prior stroke and no known peripheral arterial disease    |
| <b>PVD MI CVA</b>    | History of prior Myocardial infarction or prior stroke and concomitant peripheral arterial disease |
| <b>LDL</b>           | mean on treatment LDL cholesterol in mg/dL                                                         |
| <b>Lp(a)</b>         | Lipoprotein (a)                                                                                    |

## References

1. Bohula EA, Giugliano RP, Leiter LA, et al. Inflammatory and Cholesterol Risk in the FOURIER Trial (Further Cardiovascular Outcomes Research With PCSK9 Inhibition in Patients With Elevated Risk). *Circulation*. 2018; 138: 131-140.
2. Bonaca MP, Nault P, Giugliano RP, et al. Low-Density Lipoprotein Cholesterol Lowering With Evolocumab and Outcomes in Patients With Peripheral Artery Disease: Insights From the FOURIER Trial (Further Cardiovascular Outcomes Research With PCSK9 Inhibition in Subjects With Elevated Risk). *Circulation*. 2018;137(4):338-350.
3. Giugliano RP, Keech A, Murphy SA, et al. Clinical Efficacy and Safety of Evolocumab in High-Risk Patients Receiving a Statin: Secondary Analysis of Patients With Low LDL Cholesterol Levels and in Those Already Receiving a Maximal-Potency Statin in a Randomized Clinical Trial. *JAMA Cardiology*. 2017;2(12):1385-1391.
4. Sabatine MS, De Ferrari GM, Giugliano RP, et al. Clinical Benefit of Evolocumab by Severity and Extent of Coronary Artery Disease: An Analysis from FOURIER. *Circulation*. 2018; 138: 756-766.
5. Sabatine MS, Leiter LA, Wiviott SD, et al. Cardiovascular safety and efficacy of the PCSK9 inhibitor evolocumab in patients with and without diabetes and the effect of evolocumab on glycaemia and risk of new-onset diabetes: a prespecified analysis of the FOURIER randomised controlled trial. *Lancet Diab Endocrinol*. 2017;5(12):941-950.
6. Giugliano RP, Pedersen TR, Park JG, et al. Clinical efficacy and safety of achieving very low LDL-cholesterol concentrations with the PCSK9 inhibitor evolocumab: a prespecified secondary analysis of the FOURIER trial. *Lancet*. 2017;390(10106):1962-1971.
7. Sabatine MS, Giugliano RP, Keech AC, et al. Evolocumab and Clinical Outcomes in Patients with Cardiovascular Disease. *N Engl J Med*. 2017;376(18):1713-1722.
8. O'Donoghue M, Fazio S, Giugliano R, et al. Lipoprotein(a), PCSK9 Inhibition, and Cardiovascular Risk. *Circulation*. 2019;139(12):1483-1492.
